# Supplementary material for: Anomalous thermal transport behavior in graphene-like carbon nitride (C3N)
Source: Royal Society of Chemistry journal article supplement (doi:10.1039/d2tc02425j), 2022-01-01
Supplement: d2tc02425j1.pdf [file d2tc02425j1.pdf]

*Supporting information for*

**Anomalous thermal transport behavior in graphene-like carbon nitride (C<sub>3</sub>N)**

Guangzhao Qin,<sup>1,5</sup> Jianzhou Lin<sup>1</sup>, Huimin Wang,<sup>2</sup> Jianjun Hu,<sup>3</sup> Zhenzhen Qin,<sup>4\*</sup> and Ming Hu<sup>5\*</sup>

<sup>1</sup>*State Key Laboratory of Advanced Design and Manufacturing for Vehicle Body, College of Mechanical and Vehicle Engineering, Hunan University, Changsha 410082, P. R. China*

<sup>2</sup>*Hunan Key Laboratory for Micro-Nano Energy Materials & Device and School of Physics and Optoelectronics, Xiangtan University, Xiangtan 411105, Hunan, China*

<sup>3</sup>*Department of Computer Science and Engineering, University of South Carolina, Columbia, SC 29208, USA*

<sup>4</sup>*School of Physics and Microelectronics, Zhengzhou University, Zhengzhou 450001, China*

<sup>5</sup>*Department of Mechanical Engineering, University of South Carolina, Columbia, SC 29208, USA*

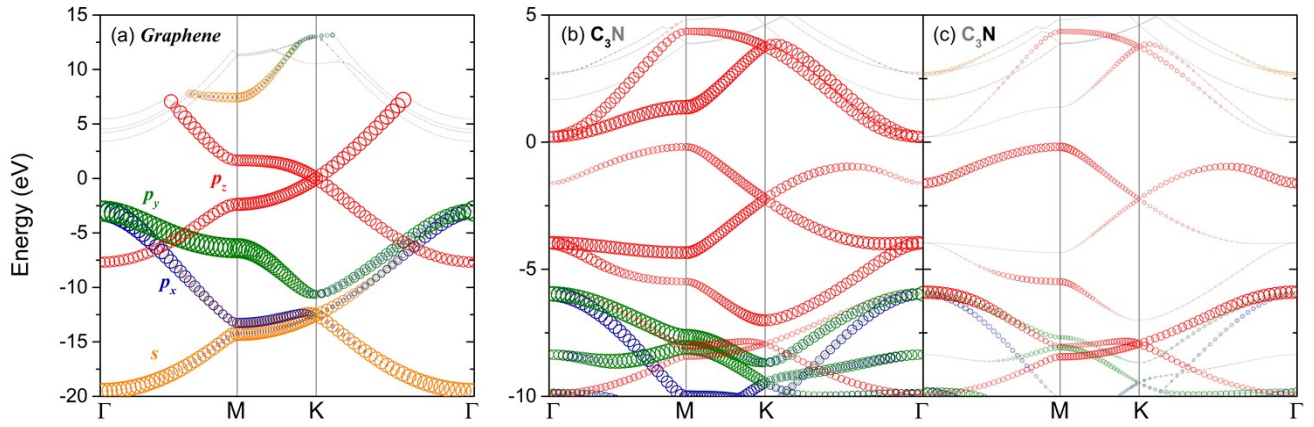

Fig. S1. The orbital projected electronic structures for (a) Graphene, (b) C atoms in C<sub>3</sub>N, and (c) N atoms in C<sub>3</sub>N. The relative contribution of corresponding orbitals are represented by the size of the circles

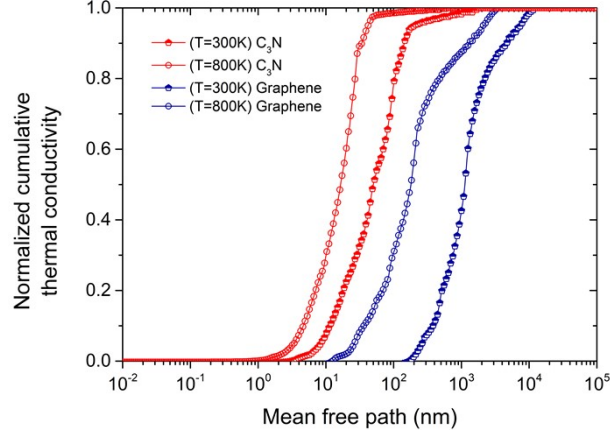

Fig. S2. Comparison of the normalized cumulative  $\kappa$  of  $C_3N$  and graphene at 300 and 800 K as a function of phonon mean free path.

To evaluate the effect of four phonons, we plotted the ratio of four-phonon scattering phase space ( $P_4$ ) to three-phonon scattering phase space ( $P_3$ ) as a function of frequency (Fig. S3). For BAs, it is shown that  $P_4$  is significantly higher than  $P_3$ , which implies that four-phonon scattering dominates the phonon-phonon scattering process. In contrast, in monolayer  $C_3N$ ,  $P_4$  is smaller than  $P_3$ , which proves that three-phonon plays a dominant role in phonon-phonon scattering. In addition, the ratio of  $P_4$  total to  $P_3$  total for BAs and  $C_3N$  is plotted in the inset of Fig. 3 to more clearly measure the effect of four-phonon scattering in  $C_3N$ . Based on the above analysis, the behavior of the four phonons in  $C_3N$  is weak and can be ignored, which is consistent with the gapless characteristics of phonon dispersions of  $C_3N$  (Fig. 1 in the main text).

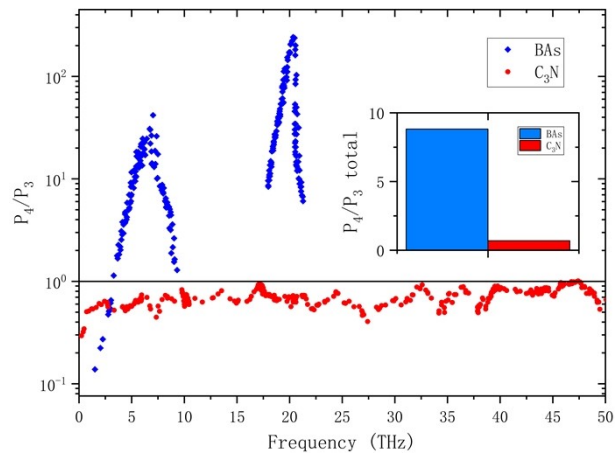

Fig. S3. The ratio of four-phonon scattering phase space (P4) to three-phonon scattering phase space (P3) for BAs and C<sub>3</sub>N. The inset shows the ratio of P<sub>4</sub> total to P<sub>3</sub> total for BAs and C<sub>3</sub>N.

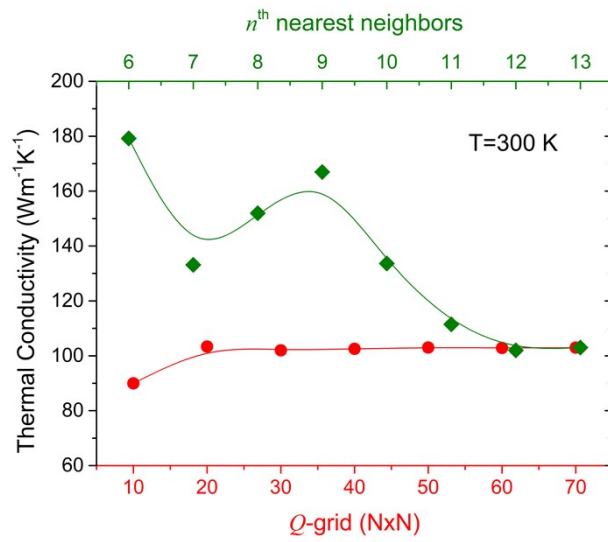

Fig. S4 The convergence test of  $\kappa$  with respect to the cutoff distance and  $Q$ -grid are fully conducted, based on which the cutoff distance is chosen as 7.36 Å (13<sup>th</sup> nearest neighbors) for the 3<sup>rd</sup> IFCs calculations and the  $Q$ -grid is chosen as  $50 \times 50 \times 1$  for the  $\kappa$  calculations.

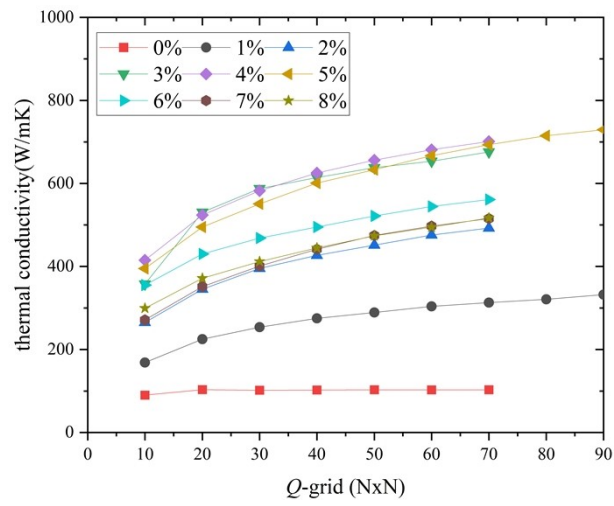

Fig. S5 Convergence test of  $\kappa$  in terms of Q-grid under at 1% to 8% strains.
